# Supplementary material for: Escitalopram promotes recovery from hand paresis in cortical sensori- motor stroke – a randomized, double-blind, placebo-controlled longitudinal study
Source: Research Square preprint supplement (doi:10.21203/rs.3.rs-7073404/v1), 2025-08-22
Supplement: Supplementary file 1 [file 262430482c16bdd4ed213010.docx]

**Supplementary Material**

**Escitalopram promotes recovery from hand paresis in cortical sensorimotor stroke – a randomized, double-blind, placebo-controlled longitudinal study**

Vanessa Vallesi, Werner Krammer, Andrea Federspiel, John H. Missimer, Manuela Pastore-Wapp, Georg Kägi, Roland Wiest, Bruno J. Weder

**Table of content:**

1. Participants and Clinical Characteristics

2. Table ST1. Correlations of behavioral data and age in normal volunteers tested (n = 28)

3. Table ST2. Comparison of behavioral data in the verum and placebo patient subgroups showing differential courses of recovery in e lementary sensori-motor tasks (1), TOR (2) and JTT associated with target reaching (3)

4. Table ST3.Additional sensorimotor tasks performance in patients and healthy controls over the long-term

5. Table ST4. Lesion distribution in the patients (n = 21)

6. Table ST5. Mean Differences in BOLD Activity Among Verum, Placebo, and Healthy Control Groups During Fixation vs. Observation

7. Table ST6. Mean Differences in BOLD Activity Among Verum, Placebo, and Healthy Control Groups During Fixation vs. Manipulation

**Participants and Clinical Characteristics**

**Inclusion Criteria**

Participants were eligible for inclusion if they had experienced a first-ever stroke with clinically significant contralesional hand plegia or paresis as the primary symptom. Neuroimaging evidence of involvement of the precentral and/or postcentral gyrus was required, as confirmed by diffusion-weighted imaging (DWI) and fluid-attenuated inversion recovery (FLAIR) sequences.

**Exclusion Criteria**

Participants were excluded if they had a history of psychiatric or neurological illness (e.g., brain tumor), were under 18 years of age, were pregnant, or were receiving any of the following medications: antidepressants; NMDA receptor agonists or antagonists; dopamine agonists or antagonists; levodopa; benzodiazepines; amphetamines; methylphenidate; foscarnet; ganciclovir; ritonavir; mianserin; chloroquine; mefloquine; imipenem; penicillin; ampicillin; cephalosporins; metronidazole; isoniazid; levofloxacin; cyclosporin; chlorambucil; vincristine; methotrexate; cytosine arabinoside; lithium; anticholinergics; systemic antihistamines; or systemic sympathomimetics. Additional exclusion criteria included any contraindication to magnetic resonance imaging (e.g., the presence of a pacemaker).

| **Table ST1. Correlations of behavioral data and age in normal volunteers tested (n = 28)** | | | | | | | | | | | | | | | | | | | | | | | | | | | | | |
| --- | --- | --- | --- | --- | --- | --- | --- | --- | --- | --- | --- | --- | --- | --- | --- | --- | --- | --- | --- | --- | --- | --- | --- | --- | --- | --- | --- | --- | --- |
| Variables | | | | r | | r2 | | | intercept | | | t | | p (2-tailed) | | | df | slope | | | Lower 95% CI | | | | Upper 95% CI | | |  | | | |
|
| PPT  vs age | | | | 0.53 | | | 0.28 | | | 1.12 | | 3.2 | | | 0.004 | 26 | | 0.047 | | | | 0.02 | | | | 0.08 | | | |
| Power  grip vs age | | | | -0.42 | | | 0.18 | | | 66.8 | | -2.38 | | | 0.025 | 26 | | -0.47 | | | | -0.88 | | | | -0.063 | | | |
| Precision grip vs age | | | | -0.19 | | | 0.04 | | | 11.1 | | **-1.0** | | | **0.32** | 26 | | -0.04 | | | | **-0.121** | | | | **0.04** | | | |
| TOR  vs age | | | -0.465 | | | | 0.22 | | | 31 | | -2.7 | | | 0.012 | | 26 | -0.04 | | -0.07 | | | | -0.01 | | | | |  | | | | |
| FG  vs age | | | | 0.085 | | | 0.007 | | | 0.98 | | **-0.4** | | | **0.664** | 26 | | -0.001 | | | | **-0.006** | | | | **0.004** | | | |
| JTT 1  vs age | | | -0.084 | | | 0.007 | | | 6.81 | | **-0.43** | | | **0.67** | 26 | | -0.014 | | | **-0.084** | | | | **0.055** | | |  | | | |
| JTT2  vs age | | | 0.56 | | | 0.31 | | | 0.55 | | 3.4 | | | 0.002 | 26 | | 0.1 | | | 0.04 | | | | 0.16 | | |  | | | |
| JTT 3  vs age | | | 0.53 | | | 0.28 | | | -1.13 | | 3.17 | | | 0.004 | 26 | | 0.11 | | | 0.04 | | | | 0.173 | | |  | | | |
| JTT 4  vs age | | | 0.77 | | | 0.6 | | | 0.5 | | 6.1 | | | <0.0001 | 26 | | -0.05 | | | 0.033 | | | | 0.066 | | |  | | | |
| JTT 5  vs age | | | 0.59 | | | 0.35 | | | 1.72 | | 3.72 | | | 0.001 | 26 | | 0.026 | | | 0.012 | | | | 0.041 | | |  | | | |
| JTT sum  vs age | | | 0.50 | | | 0.35 | | | 8.45 | | 3.76 | | | 0.001 | 26 | | 0.27 | | | 0.28 | | | | 0.41 | | |  | | | |

Abbreviations: df, degrees of freedom; CI, confidence interval; PPT, pressure perception threshold; JTT, Jebsen-Taylor Test; FG, ginger gaiting. In bold: the values indicate no dependence on age in the tested population (range 42 to 85 years.

| **Table ST2. Comparison of behavioral data in the verum and placebo patient subgroups showing differential courses of recovery in elementary sensori-motor tasks (1), TOR (2) and JTT associated with target reaching (3)** | | | | | | | | | | | |
| --- | --- | --- | --- | --- | --- | --- | --- | --- | --- | --- | --- |
| **Task** | | **Subgroup** | **Baseline (e0)** | **3 Months (e3)** | **9 Months (e9)** | **Wilcoxon signed**  **rank test [z]*** | | | **Friedman test [csqr]** | | |
| **Median IQR** | | | | **e0 vs e3** | **e3 vs e9** |  | | |  | |
| PPT  [g/mm2] | | Verum | 5 (1.25) | 5 (1) | 5 (0.25) | - | - |  | | 3.8ns | | |
| Placebo | 8 (4) | 6 (2) | 7 (3) | - | - |  | | | 1.5 ns | |
|  | MW test |  | z = -0.58 ns * | z=-1.39 ns | z = 1.35 ns |  |  |  | | |  | |
| Power grip  [kg] | | Verum | 22 (16.8) | 29 (15.5) | 26 (11.5) | - | - |  | | | -2.79 ns (8.35*)+ | |
| Placebo | 32 (20) | 35 (10) | 38 (18) | - | - |  | | | 2.89 ns (13.5*)+ | |
|  | MW test |  | z = -0.85 ns | z = -1.07 ns | z = -1.53 |  |  |  | | |  | |
| Precision grip  [kg] | | Verum | 5.8 (2.5) | 7.3 (1.6) | 6.8 (3.3) | - | - |  | | | 1.63 ns (11.9*)+ | |
| Placebo | 9 (5.5) | 9 (2) | 9.5 (2.5) | - | - |  | | | 0.39 ns (12.9*)+ | |
|  | MW test |  | z = -0.43 ns | z = -1.67 ns | z = -1.6 ns |  |  |  | | |  | |
|  | MW test |  | z = 0.53ns | z = 0.14ns | z = 1.07ns |  |  |  | | |  | |
| TOR  [s] | | Verum | 26 (4) | 29 (3) | 30 (1.3) | -2.24, p < 0.05 |  |  | | | 9.29, p < 0.01 | |
| Placebo | 24 (5) | 28 (3) | 30 (0) | W = -45, p < 0.01# |  |  | | | 12,17, p < 0.005 | |
|  | MW test |  | z = 0.92 ns | z = 0.28 ns | -0.64 |  |  |  | | |  | |
| JTT 2  [s] | | Verum | 8.8 (86.4) | 9.0 (4.9) | 8 (5.5) | 1.67 ns | 1.86 ns |  | | | 6.54, p < 0.05 | |
| Placebo | 7.3 (39.8) | 7.1 (2.7) | 6.3 (4.4) | - | - |  | | | 2.0 ns | |
|  | MW test |  | z = 0.5 ns | z = 0.96 ns | z = 0.64 ns |  |  |  | | |  | |
| JTT 3  [s] | | Verum | 7.2 (47.8) | 6.4 (3.6) | 5.8 (4.1) | 2.7, p < 0.01 | - |  | | | 10.5, p < 0.001 | |
| Placebo | 6.5 (14.7) | 5.8 (1.4) | 4.8 (2.6) |  |  |  | | | 1.89ns | |
|  | MW test |  | z = 0.43 ns | z = 0.39 ns | z = 0.28 ns |  |  |  | | |  | |
| JTT 4  [s] | | Verum | 4.9 (45.2) | 4.8 (2.4) | 4.25 (2) | 1.9 ns | 2.27, p < 0.05 |  | | | 8.2, p < 0.05 | |
| Placebo | 3.9 (3.1) | 3.9 (0.2) | 3.7 (0.6) | - | - |  | | | 1.39,ns | |
|  | MW test |  | z = 0.82 ns | z = 1.03 ns | z = 0.99 ns |  |  |  | | |  | |
| JTT 5  [s] | | Verum | 4.7 (45.4) | 4.4 (3) | 4.3 (2.5) | 2.3, p < 0.05 | 2.6, p < 0.01 |  | | | 15.2, p < 0.001 | |
| Placebo | 4.3 (2.9) | 3.8 (0.5) | 3.4 (0.8) | W = -35.5, p < 0.05# | - |  | | | 8.17, p < 0.05 | |
|  | MW test |  | z = 0.68 ns | z = 1.1 ns | z = 0.82 ns |  |  |  | | |  | |

Legend: * significance is related to two-sided p-values; # in the case of small samples, i.e. ns/r <10, the sum of all the signed

ranks W is given instead of a z-value; + the values for the additional inclusion of ei (k = 4) are given in brackets.

| **Table ST3.** **Additional sensorimotor tasks performance in patients and healthy controls over the long-term** | | | | | |
| --- | --- | --- | --- | --- | --- |
| Variable |  | Median (IQR) | | |  | |
| Patients (n = 21)  Baseline(e0) | Patients  (n = 21)  3 months(e3) | Patients  (n = 21)  9 months(e9) | Healthy Controls | Kruskal  Wallis  [H] | |
| Power grip [kg] | 27 (18) | 31 (18) | 29 (19) | 32 (10.5) | 6.0ns | |
| JTT subtest 2 [s] | 8.1 (57.9) | 7.9 (3.8) | 7.9 (4.2) | 6.3 (1.9) | 5.52 ns | |
| JTT subtest 3 [s] | 6.9 (15) | 5.8 (3.1) | 5.8 (3.5) | 5.3 (1.5) | 5.31 ns | |
| JTT subtest 4 [s] | 4.8 (2.86) | 4 (1.8) | 4 (1.9) | 4 (0.38) | 5.01 ns | |
| JTT subtest 5 [s] | 4.5 (2.2)***** | 3.9 (2.7) | 3.7 (2.4) | 3.6 (0.53) | 9.62, p < 0.02 | |
| JTT sum [s] | 43.6 (159.8)***** | 28.9 (19.9)***** | 29.2 (23.7) | 24.6 (8.1) | 8.34. p < 0.04 | |

These parameters are age-dependent and were therefore analyzed using a matched subgroup of older participants (n = 16, age range: 60–85 years) for non-parametric statistical evaluation. The Kruskal-Wallis test revealed a significant result for JTT subtest 5, which involves lifting and moving large, heavy cans, as well as for the JTT sum score, which also includes JTT subtest 1 as detailed in Table 3. Pairwise comparisons were performed using the Mann-Whitney U test. A significance threshold (two-sided) of p < 0.05 was applied, with correction for multiple comparisons using the Bonferroni method. The asterisks indicate significant results comparing patients and healthy controls. Abbreviations: JTT, Jebsen-Taylor Test; IQR, Interquartile Range; ns, not significant.

| **Table ST4. Lesion distribution in the patients (n = 21)** | | | | | | | | | | | | | | | | | | | |
| --- | --- | --- | --- | --- | --- | --- | --- | --- | --- | --- | --- | --- | --- | --- | --- | --- | --- | --- | --- |
| **Patient ID** | | **Side** | **PMC** | | **4a** | **4p** | | **3a** | **3b** | | **1** | **2** | | **Underlying White Matter** | | | **Additional Cortical Areas** | | |
| 1 | | L | 6d1, 6d2+ | |  | + | | + |  | |  |  | | + | | | SPL-7A, IPS-hIp3 | | |
| 3 | | R |  | |  | + | | + | + | |  | + | | + | | | SPL-7PC, IPS-hIp1-2 | | |
| 4 | | L | 6d1+ | | + | + | | + | + | |  |  | | + | | |  | | |
| 5 | | R |  | |  | + | |  | + | | + | + | | + | | | SPL-5L,7PC, IPS-hIp1/3 | | |
| 6 | | L |  | | + | + | | + | + | | + | + | | ++ | | | SPL-5L, 7PC, IPL-PFm, IPL-Pga, PGp, IPS-hIp5-6/8, Visual-hOc4la/p | | |
| 8 | | R |  | | + | + | |  | + | | + | + | | + | | | IPS-hIp2 | | |
| 9 | | L |  | |  |  | |  | + | | + | + | | (+) | | | SPL-5L,7PC, IPS-hIp3, MFG-BA8, hOc4d | | |
| 10 | | L | 6d1-3+ | | + | + | | + | + | | + | + | | +++ | | | SPL-7A, IPL-PF, PF-t/cm/op, IPL-PGa, PGp, IPS-hIp1-3/5-8, hpO1, MFG-BA8-9, fOPC-Op8, OP1-2, Id6-7, Ig1/3, hOc4lp | | |
| 11 | | L |  | |  | + | | + | + | |  | + | | + | | | SPL-5L | | |
| 12 | | R | 6d1-3+ | | + | + | | + | + | | + | + | | + | | | SPL-7A/7P, IPS-hIp4-5/7-8, hOc4la/p, hOcV5/MT, hOc1-2/3d, frontal Pole, ITG | | |
| 13 | | R | 6d1-3+ | |  | + | | + | + | |  | + | | + | | | IPL-PFt | | |
| 14 | | R |  | |  |  | | + | + | |  | + | | + | | | SPL-5Ci, 7PC, hIp1-3 | | |
| 15 | | L |  | |  | + | | + | + | |  | + | | + | | |  | | |
| 16 | | L | 6d1-3+ | | + |  | | + | + | |  | + | | + | | | SPL-5L/7A/7P/7PC, IPL-PF, PFM, IPL-Pga, PGp, IPS-hIp1-5/7-8, hpO1, hOc2/3d/4d/4lp, MFG-BA8 | | |
| 17 | | L | 6d1-3+ | | + | + | |  |  | | + | + | | + | | | SPL-7A,7PC, IPS-hIp3, hOc2/3d, dlPFC* | | |
| 18 | | L | 6d1+ | | + | + | | + |  | |  |  | | + | | |  | | |
| 20 | | R | 6d1-3+ | | + | + | | + | + | |  |  | | (+) | | |  | | |
| 21 | | R | 6d1, 3+ | |  | + | | + | + | |  | + | | ++ | | | SPL-7PC, IPL-PFt, PFm, PGa, IPS-hIp1-3, dlPFC, MFG-BA8 | | |
| 22 | | L | 6d1, 3+ | |  | + | | + | + | | + | + | | + | | | SPL-7A,7PC, IPL-PFt, PFm, IPS-hIp2,6 | | |
| 23 | | L |  | |  | + | | + |  | |  | + | | (+) | | | SPL-5L, 7PC, IPS-hIp3 | | |
| 24 | | L | 6d1, 2+ | |  |  | |  |  | |  |  | | (+) | | |  | | |
|  | | | | | | | |  |  | |  |  | |  | | |  | | |
| Abbreviations: Cytoarchitectonically defined anatomical areas (Julich Cytoarchitectonic Atlas 3.1 (EBRAINS, Siibra): PMC: Premotor cortex (6d1-3); Motor cortex (4a, 4p, 3a, 3b, 1, 2); SPL: Superior parietal lobule (5L, 5Ci, 7PC, 7A, 7P); IPL: inferior parietal lobule (PF, PFt, PFcm, PFm, Pfop, Pga, PGp); IPS: Intraparietal sulcus (hIp1-8, hpO1); Visual cortex: (hOc2, 3d, 4d, 4la, 4lp, 5M, V5/MT); fOPC: Frontal opercular cortex (OP8); pOPC: Parietal Operculum (OP1, 2); Insula: (Id6, 7; Ig1, 3); dlPFC: Dorsolateral prefrontal cortex; MFG: Middle frontal gyrus; BA: Brodmann area; ITG: Inferior temporal gyrus. | | | | | | | | | | | | | | | | | | | |
| **Table ST5. Mean Differences in BOLD Activity Among Verum, Placebo, and Healthy Control Groups During Fixation vs. Observation** | | | | | | | | | | | | | | | | | | | |
| **Baseline (e0)** | | | | **F-Value(2, 41)** | | | **P-ValueFWE** | | | **MNI coordinates** | | | | | | **Healthy controls vs placebo-group** | | **Healthy controls vs verum-group** | **Placebo-group vs verum-group** |
| **X** | | | **Y** | | **Z** |
|  | R PCG, area 6v3, 6v2 | | | 22.71 | | | 0.001 | | | 54 | | | 5 | | 35 | -0.76ns [-3.07, 1.54] | | -2.17*  [-4.19, -0.16] | -1.41ns  [-4.09, 1.27] |
| **3 Months (e3)** | | | |  | | |  | | |  | | |  | |  |  | |  |  |
|  | L inf, middle occ g, area hOc5 | | | 35.08 | | | < 0.001 | | | -40 | | | -75 | | -1 | -1.39ns  [-4.63, 1.84] | | -4.64**  [-7.64, -1.63] | -3.24ns  [-7.02, 0.53] |
| **9 Months (e9)** | | | |  | | |  | | |  | | |  | |  |  | |  |  |
|  | L inf occ g, area hOc5, hOc4la | | | 31.79 | | | < 0.001 | | | -42 | | | -76 | | 0 | -0.86ns  [-3.75, 2.03] | | -4.07***  [-6.59, -1.55] | -3.21ns  [-6.56, 0.15] |
|  | R inf occ g, area hOc4la | | | 32.70 | | | < 0.001 | | | 41 | | | -74 | | -1 | -2.39ns  [-6.11, 1.33] | | -5.78***  [-9.03, -2.54] | -3.39ns  [-7.71, 0.93] |
|  | R PoG, IPS, SPL, area 2, hIP3, 7PC | | | 23.46 | | | 0.001 | | | 31 | | | .36 | | 51 | -0.64ns [-3.18, 1.89] | | -2.68*  [-4.89, -0.47] | -2.04ns  [-4.98, 0.91] |
|  | | | | | | | | | | | | |  | |  |  | |  |  |
| Abbreviations: *, p < 0.05; **, p < 0.01; ***, p < 0.001; ns, not significant; FWE, family-wise error; MNI, Montreal Neurological Institute; R, right; L, left; PCG, precentral gyrus; inf occ g, inferior occipital gyurs; PoG, postcentral gyrus; IPS, intraparietal sulcus; SPL, superior parietal lobule. | | | | | | | | | | | | | | | | | | | |
| Note: All p-values are family-wise error corrected for 0.05, and post-hoc tests are adjusted using Tukey HSD. The coordinates represent the center of gravity of the determined structure in each cluster. | | | | | | | | | | | | | | | | | | | |

| **Table ST6. Mean Differences in BOLD Activity Among Verum, Placebo, and Healthy Control Groups During Fixation vs. Manipulation** | | | | | | | | | | | | | | | | | | | | | | | |
| --- | --- | --- | --- | --- | --- | --- | --- | --- | --- | --- | --- | --- | --- | --- | --- | --- | --- | --- | --- | --- | --- | --- | --- |
| **Baseline (e0)** | | | **F-Value(2, 41)** | | **P-ValueFWE** | | **MNI coordinates** | | | | | | | | | **Healthy controls vs placebo-group** | | | **Healthy controls vs verum-group** | | | **Placebo-group vs verum-group** | | |
| **X** | | | **Y** | | | **Z** | | |
|  | R PCG, area 6v1 | | 36.2 | | <0.001 | | 34 | | | -13 | | | 65 | | | -5.51*  [-10.35, -0.68] | | | -0.95ns  [-5.17, 3.27] | | | 4.57ns  [-1.03, 10.16] | | |
|  | R IPL, area PFt, PFop | | 25.16 | | <0.001 | | 55 | | | -24 | | | 33 | | | -2.97ns  [-7.02, 1.09] | | | -3.95*  [-7.48, -0.41] | | | -0.98ns  [-5.69, 3.73] | | |
|  | L post Putamen | | 26.35 | | <0.001 | | -31 | | | -18 | | | 6 | | | -1.49*  [-2.93, -0.05] | | | -0.07ns  [-1.20, 1.31] | | | 1.54ns  [-0.13, 3.22] | | |
|  | R thalamus ve- la-po nc | 27.52 | | <0.001 | | 15 | | -20 | | | 10 | | | -1.10*  [-2.13, -0.07] | | | -0.67ns  [-1.57, 0.23] | | | 1.43ns  [-0.77, 1.63] | | |
|  | L FOP, area OP6 | | 25.11 | | <0.001 | | -52 | | | 6 | | | 5 | | | -0.53ns  [-2.01, 0.95] | | | -1.53*  [-2.83, -0.24] | | | -1.01ns  [-2.73, 0.72] | | |
|  | R PCG, area 6v3, 6v2 | | 24.52 | | <0.001 | | 59 | | | 7 | | | 31 | | | **-2.61***  **[-5.20, -0.02]** | | | **-2.85***  **[-5.12, -0.58]** | | | -0.25ns  [-3.26, 2.77] | | |
| **3 Months (e3)** | | |  | |  | |  | | |  | | |  | | |  | | |  | | |  | | |
|  | L SMA,area 6mp,  Cing. motor. area | | 73.38 | | <0.001 | | -8 | | | -7 | | | 64 | | | 2.09*  [0.28, 3.90] | | | 0.83ns  [-0.85, 2.51] | | | -1.26ns  [-3.37, 0.85] | | |
|  | R FOP, area OP6,8; inf BA44 | | 25.46 | | <0.001 | | 51 | | | 7 | | | 2 | | | -0.37ns  [-3.58, 2.85] | | | -3.78*  [-6.77, -0.79] | | | -3.41ns  [-7.15, 0.33] | | |
|  | L dlPFC, MFG4 | | 35.27 | | <0.001 | | -36 | | | 41 | | | 26 | | | 2.45*  [0.36, 4.55] | | | 0.46ns  [-1.48, 2.41] | | | -1.99ns  [-4.44, 0.46] | | |
|  | L FOP, area 6, post inf BA44 | | 21.71 | | 0.001 | | -50 | | | 6 | | | 4 | | | 1.88**  [0.62, 3.13] | | | -0.09ns  [-1.26, 1.08] | | | **-1.97****  **[-3.4, -0.50]** | | |
|  | R PCG, area 6v3 | | 29.65 | | <0.001 | | 57 | | | 7 | | | 30 | | | 0.52ns  [-1.78, 2.82] | | | -2.37*  [-4.51, -0.24] | | | **-2.90***  **[-5.58, -0.21]** | | |
|  | L post putamen | | 25.01 | | <0.001 | | -30 | | | -17 | | | 6 | | | 0.54ns  [-0.04, 1.11] | | | -0.15ns  [-0.68, 0.38] | | | **-0.69***  **[-1.36, -0.02]** | | |
|  | L anterior Insula Id6, Id7,Id8 | | 19.76 | | 0.003 | | -30 | | | 19 | | | 10 | | | 1.59***  [0.73, 2.44] | | | 0.16ns  [-0.63, 0.96] | | | **-1.42****  **[-2.41, -0.43]** | | |
| **9 Months (e9)** | | |  | |  | |  | | |  | | |  | | |  | | |  | | |  | | |
|  | R PCG, PoCG | | 37.62 | | <0.001 | | 38 | | | -27 | | | 51 | | | -4.34**  [-7.74, -0.93] | | | -1.38ns  [-4.35, 1.59] | | | 2.95ns  [-1.00, 6.90] | | |
|  | L thalamus md and ant il nuclei | | 45.16 | | <0.001 | | -15 | | | -23 | | | 11 | | | -0.80**  [-1.38, -0.22] | | | 0.13ns  [-0.37, 0.64] | | | **0.93****  **[0.26, 1.60]** | | |
|  | R dlPFC, area MFG4 | | 22.27 | | 0.001 | | 35 | | | 38 | | | 36 | | | 0.16ns  [-2.10, 2.42] | | | 2.65**  [0.68, 4.63] | | | 2.49ns  [-0.14, 5.12] | | |
|  | R dlPFC, area  MFG4, MFG1 | | 26.84 | | <0.001 | | 40 | | | 43 | | | 25 | | | 1.30*  [0.34, 2.26] | | | 0.37ns  [-0.47, 1.21] | | | -0.93ns  [-2.05, 0.18] | | |
|  | L visual cortex V1,area hOc1 | | 22.68 | | 0.001 | | -11 | | | -66 | | | 7 | | | -0.66ns  [-2.12, 0.80] | | | -1.28*  [-2.56, -0.01] | | | -0.62ns  [-2.32, 1.08] | | |
|  | L Insula, Id6,Id7 | | 21.76 | | 0.002 | | -32 | | | 18 | | | 9 | | | 1.09*  [0.00, 2.17] | | | 0.58ns  [-0.36, 1.53] | | | -0.51ns  [-1.77, 0.76] | | |
|  | | | | | | | | |  | | |  | | |  | | |  | | |  | | |
| Abbreviations: *, p < 0.05; **, p < 0.01; ***, p < 0.001; ns, not significant; FWE, family-wise error; MNI, Montreal Neurological Institute; R, right; L, left; PCG, precentral gyrus; PoCG, postcentral gyrus; IPL, inferior parietal lobule; OP, operculum; SMA, supplementary motor area; MFG, middle frontal gyrus; BA, Brodmann area; PoG, postcentral gyrus; cing., cingulate; md, medial-dorsal. | | | | | | | | | | | | | | | | | | | | | | | |
| All p-values are family-wise error corrected at the 0.05 level, and post-hoc tests are adjusted using Tukey HSD. The aim was to investigate whether significant long-term differences emerge between the escitalopram and placebo subgroups at time points e3 and e9. These areas are indicated by bold p-values in the corresponding column, along with significantly enhanced BOLD activities in both patient subgroups compared to healthy volunteers at e0, and are summarized in Table 4 of the manuscript. | | | | | | | | | | | | | | | | | | | | | | | |
